# Supplementary material for: Interlinkages of Water-Related SDG Indicators Globally and in Low-Income Countries
Source: MDPI journal article supplement (doi:10.3390/w15040613), 2023-02-04
Supplement: s1 [file s1]

## Supplementary

Supplementary Figure S1.a) Positive trend; b) negative trend

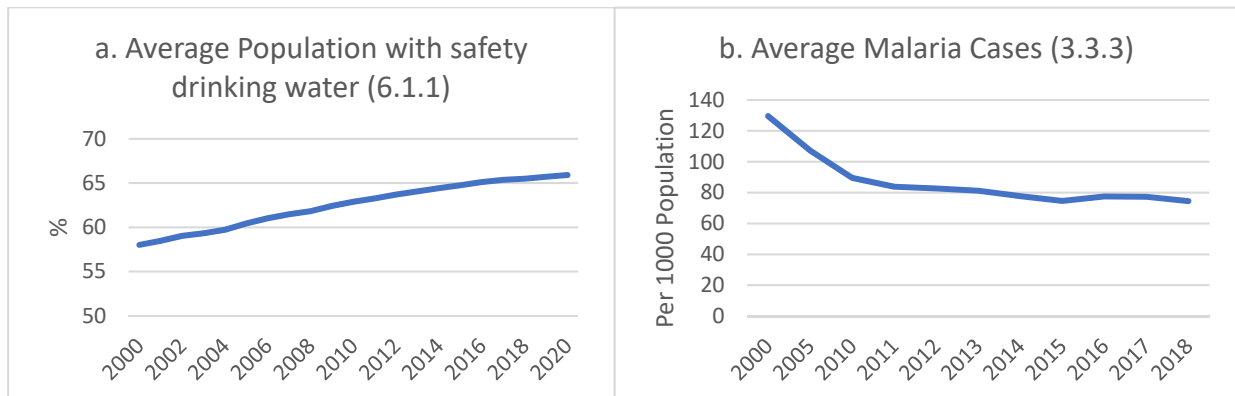

Supplementary Figure S2 shows the trends of example indicators (3.3.5 and 6.4.1) for different income levels and a scatterplot of data related to indicators 3.3.5 and 6.4.1 for all nations.

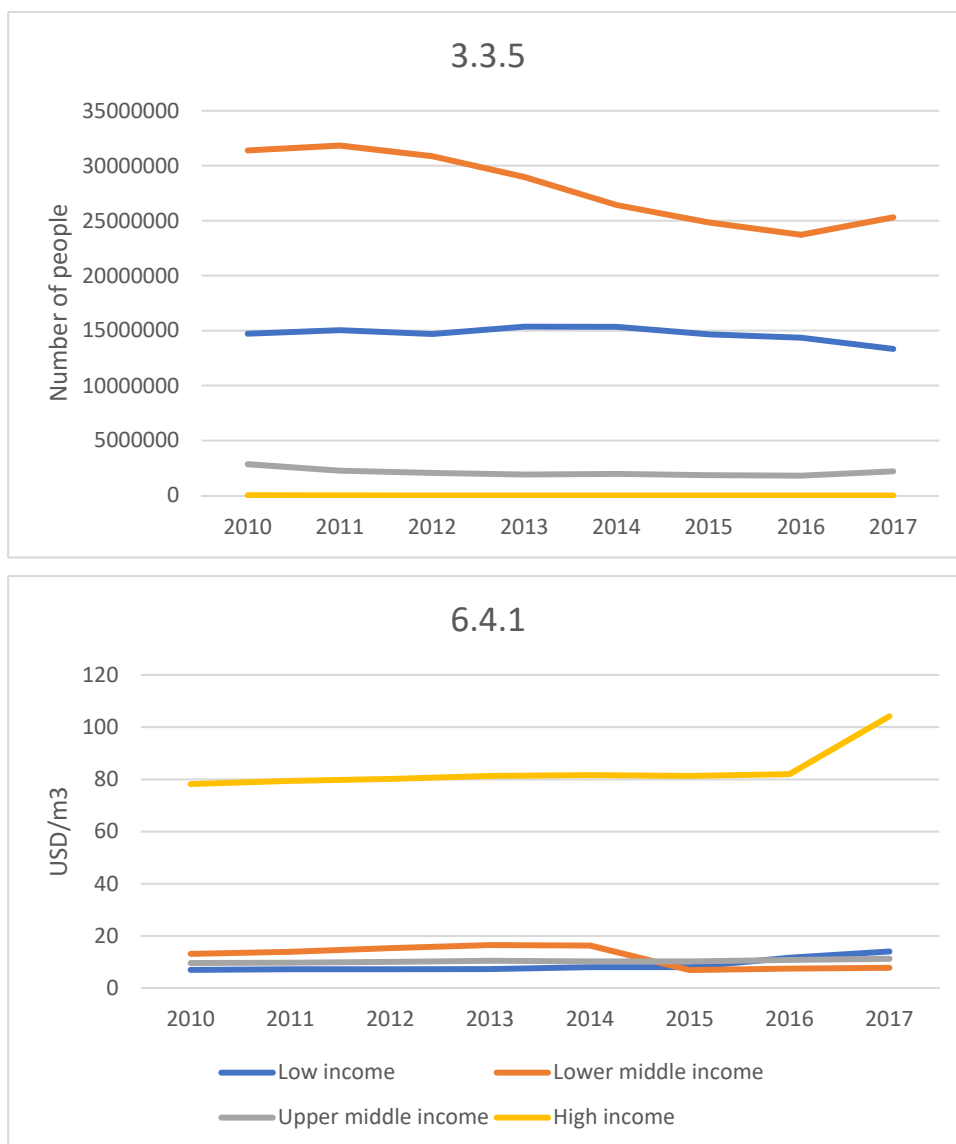

Supplementary Figure S3 Scatter plot of the correlations between indicators, GDP and population size

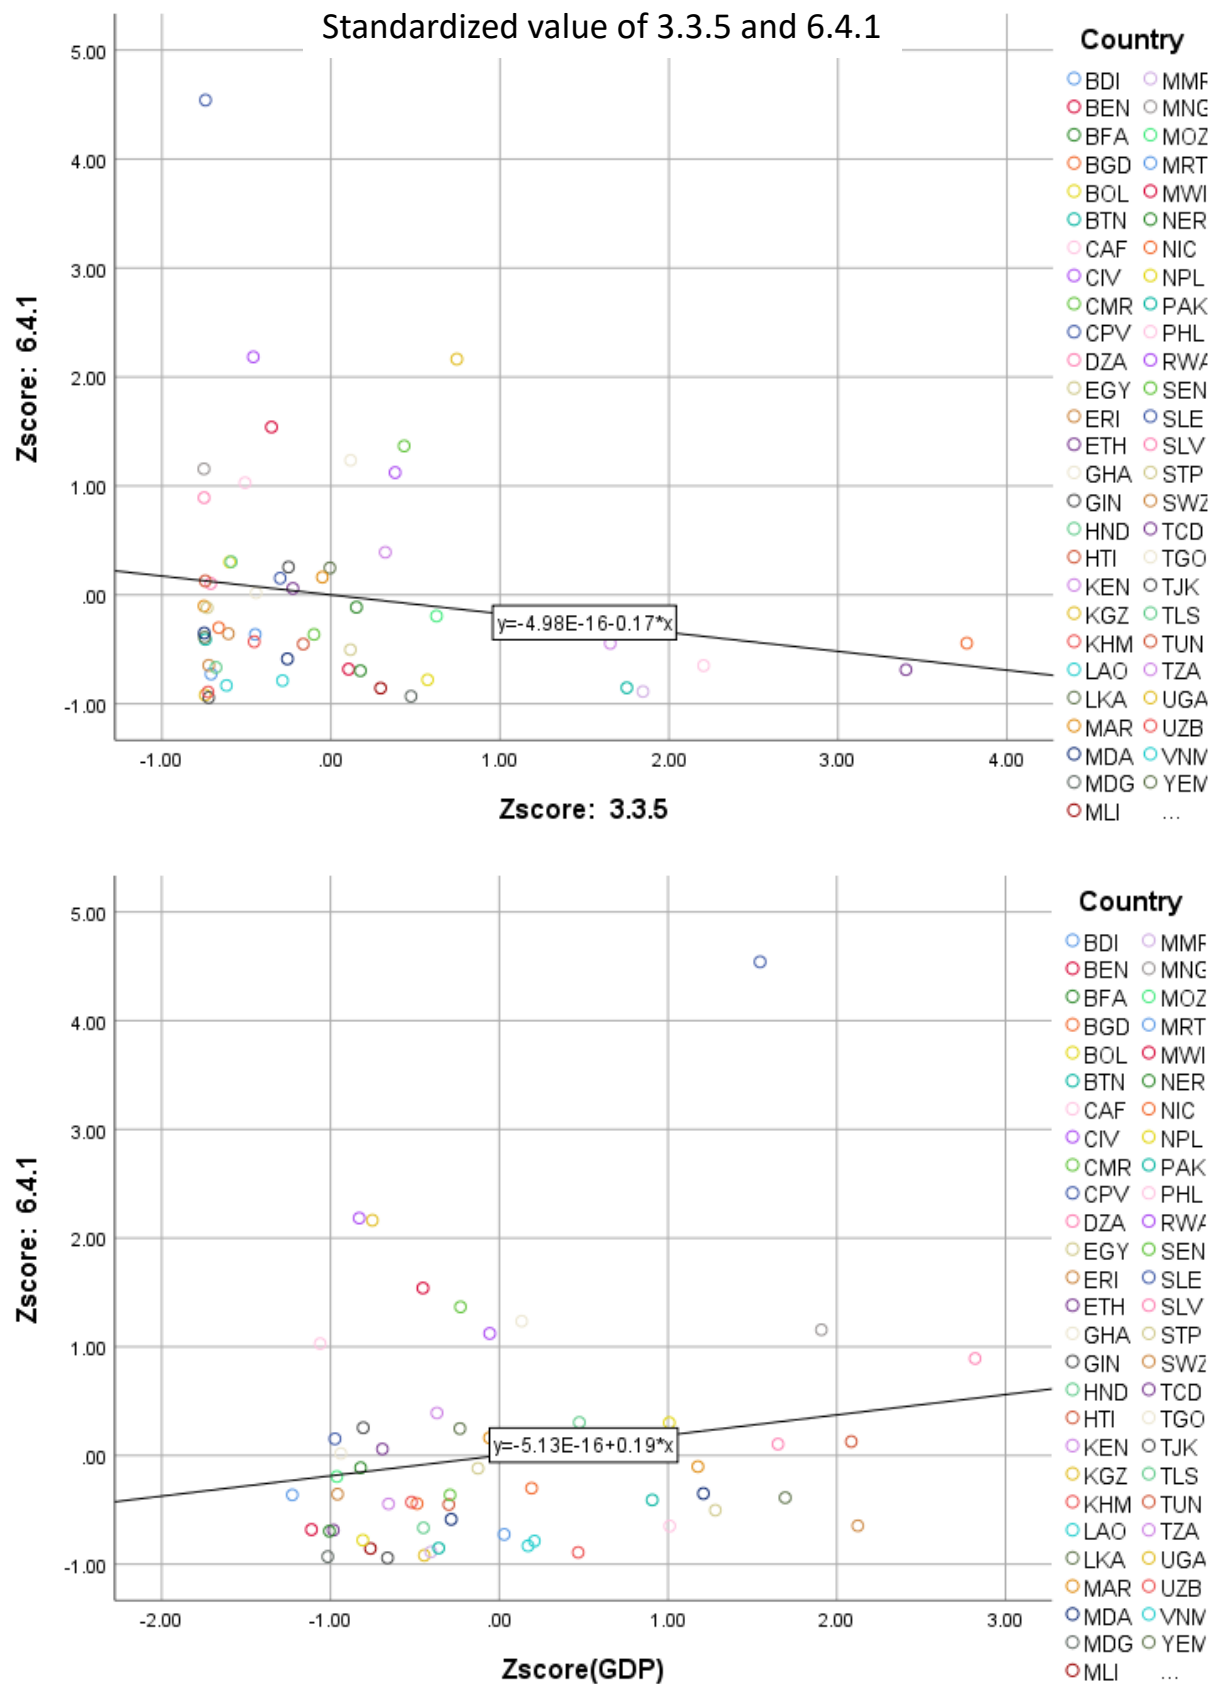

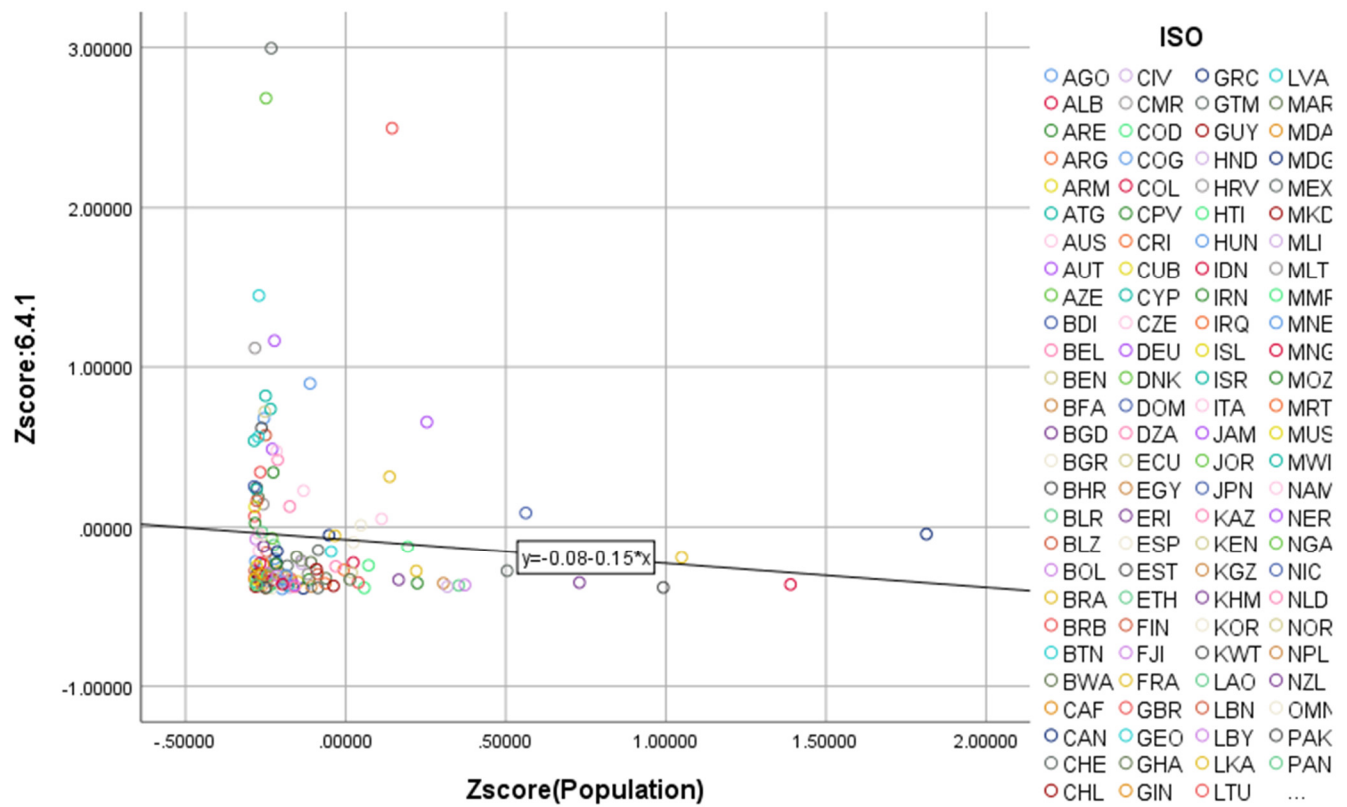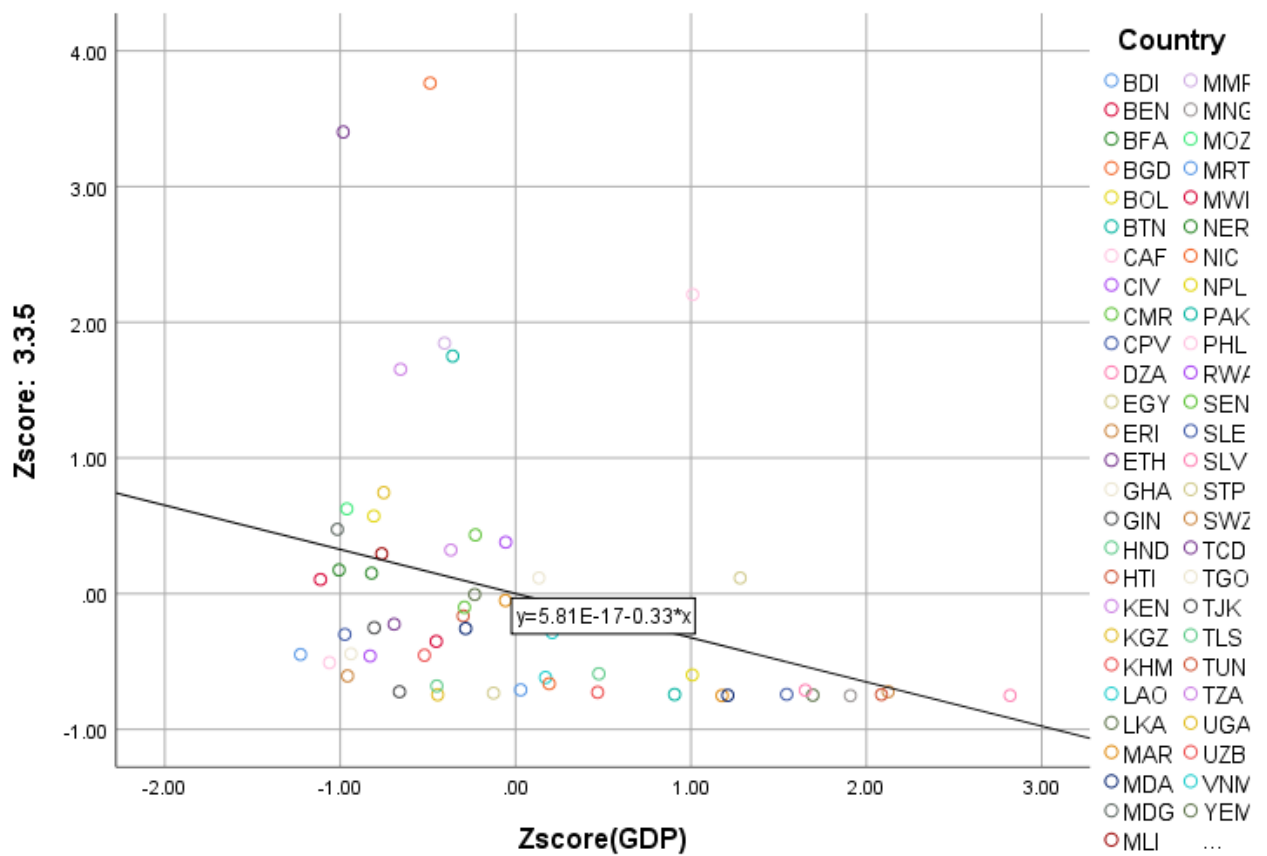

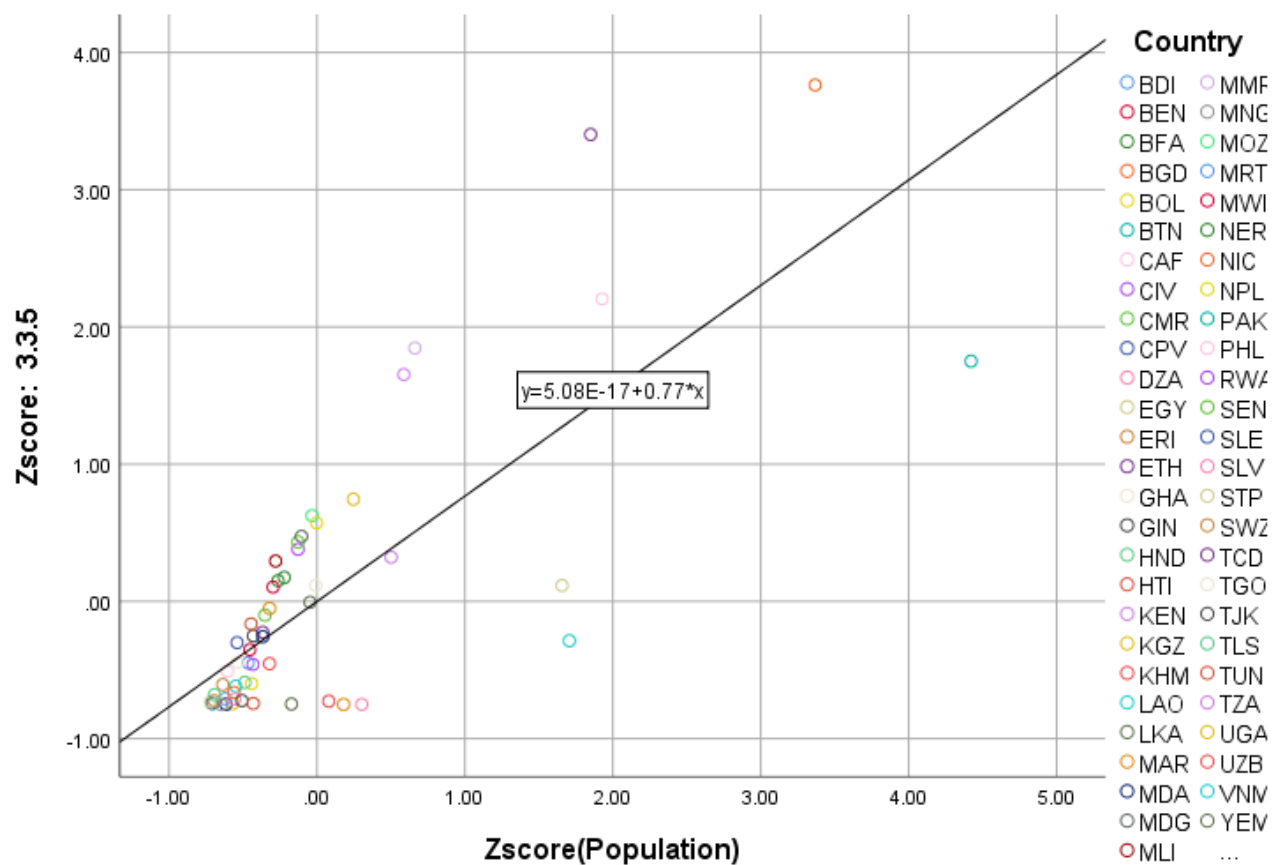

Supplementary Figure S4 Scatterplot shows yearly trend (the increase/decrease) of indicator influenced by population and GDP.

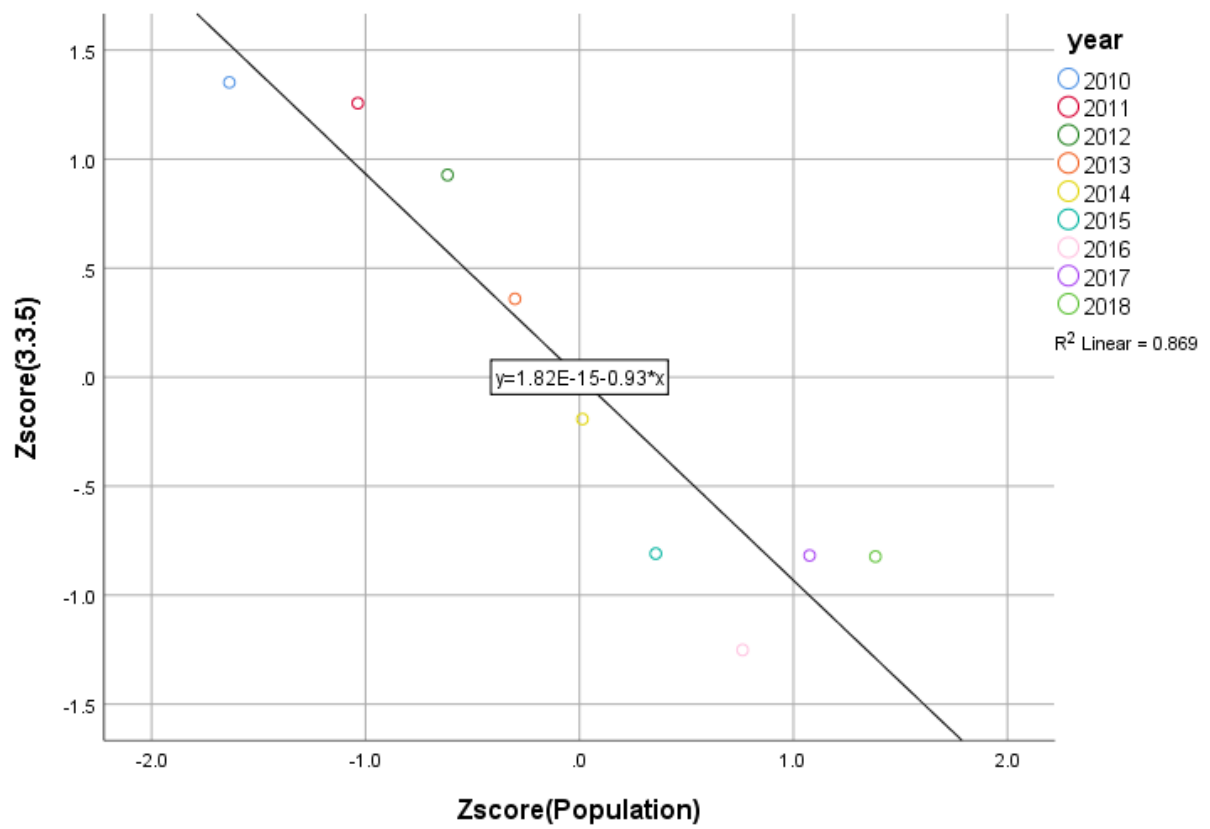

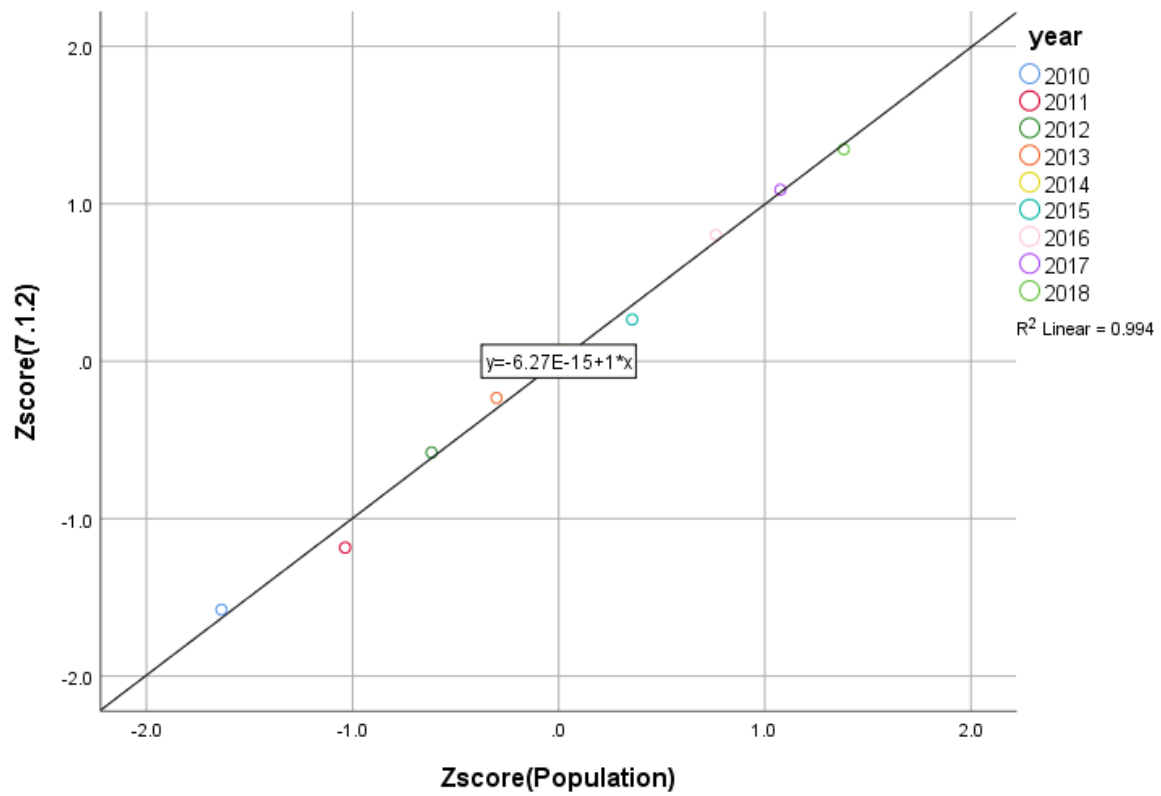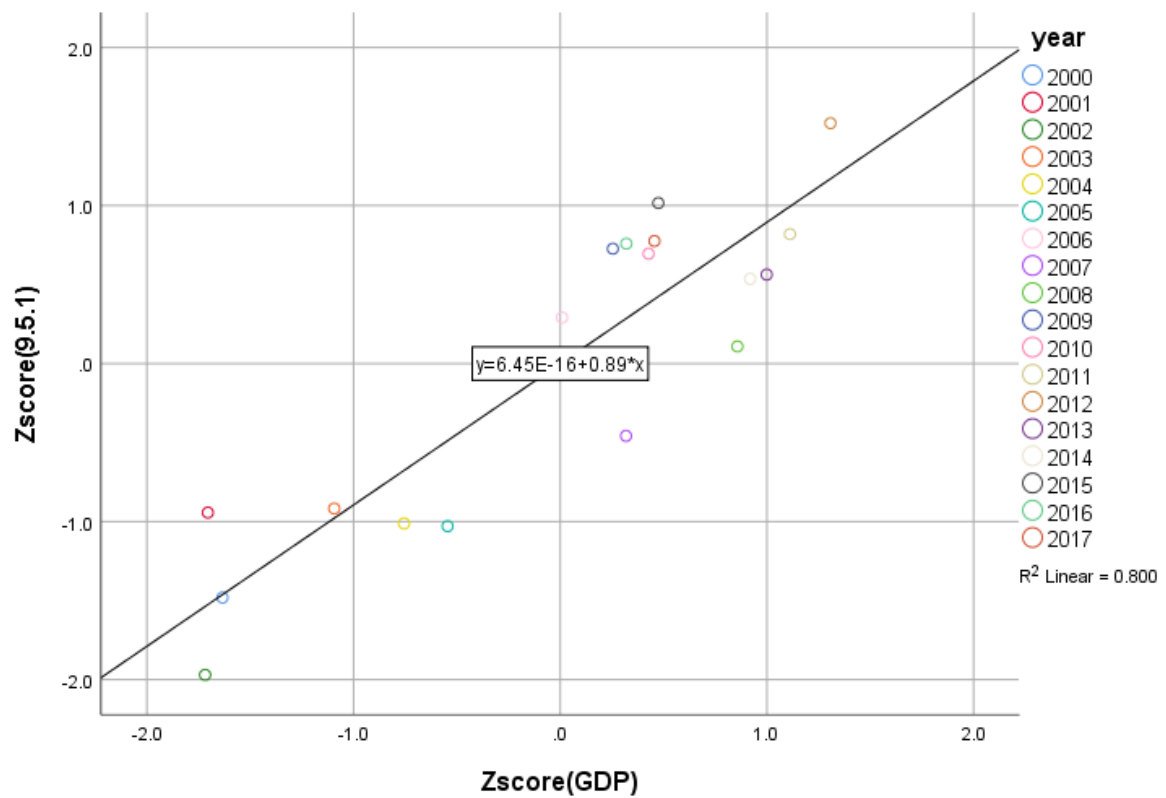

Supplementary Table S1. The magnitudes of the standardized coefficients (beta) of synergistic and trade-off interactions between indicators

| Dependent indicator 1 | Adjusted R square | Standardized coefficients (independent variable) |        |        | Dependent indicator 2 | Adjusted R square | Standardized coefficients (independent variable) |       |        |
|-----------------------|-------------------|--------------------------------------------------|--------|--------|-----------------------|-------------------|--------------------------------------------------|-------|--------|
|                       |                   | Indicator 2                                      | GDP    | Pop    |                       |                   | Indicator 1                                      | GDP   | Pop    |
| 1.5.1                 | <b>0.90</b>       | 0.94                                             | -0.02  | 0.06   | 4.a.1a                | <b>0.90</b>       | 0.96                                             | 0.03  | -0.05  |
| 3.3.3                 | <b>0.52</b>       | 0.72                                             | -0.01  | -0.06  | 3.9.2                 | <b>0.55</b>       | 0.66                                             | -0.21 | 0.01   |
| 3.3.5                 | 0.06              | 0.04                                             | -0.31  | -0.12  | 6.4.1                 | <b>0.45</b>       | 0.03                                             | 0.69  | 0.00   |
| 3.3.5                 | 0.35              | 0.61                                             | 0.03   | -0.06  | 7.2.1                 | <b>0.49</b>       | 0.49                                             | -0.39 | -0.04  |
| 3.3.5                 | -0.24             | -0.15                                            | -0.25  | -0.11  | 12.4.2a               | -0.27             | -0.15                                            | 0.16  | -0.15  |
| 3.9.2                 | <b>0.48</b>       | -0.66                                            | -0.07  | -0.02  | 4.a.1b                | <b>0.516</b>      | -0.592                                           | 0.26  | 0.04   |
| 3.9.2                 | <b>0.40</b>       | -0.68                                            | 0.04   | 0.08   | 6.1.1                 | <b>0.55</b>       | -0.52                                            | 0.03  | 0.41   |
| 3.9.2                 | <b>-0.878</b>     | -0.878                                           | -0.009 | 0.05   | 7.1.1                 | <b>0.780</b>      | -0.841                                           | 0.101 | 0.062  |
| 3.9.2                 | <b>0.770</b>      | -0.878                                           | -0.009 | 0.05   | 7.1.2                 | <b>0.780</b>      | -0.841                                           | 0.101 | 0.062  |
| 3.9.2                 | <b>0.505</b>      | 0.716                                            | -0.03  | -0.01  | 7.2.1                 | <b>0.504</b>      | 0.716                                            | 0.023 | -0.006 |
| 4.a.1a                | 0.20              | 0.01                                             | 0.49   | 0.09   | 6.4.1                 | <b>0.59</b>       | 0.01                                             | 0.77  | -0.02  |
| 4.a.1a                | <b>0.485</b>      | 0.634                                            | 0.17   | -0.07  | 7.1.1                 | <b>0.467</b>      | 0.656                                            | 0.089 | 0.09   |
| 4.a.1a                | <b>0.55</b>       | 0.71                                             | 0.08   | 0.00   | 7.1.2                 | <b>0.566</b>      | 0.677                                            | 0.17  | -0.01  |
| 4.a.1b                | <b>0.64</b>       | 0.81                                             | 0.01   | 0.07   | 6.1.1                 | <b>0.68</b>       | 0.73                                             | 0.19  | -0.06  |
| 4.a.1b                | <b>0.77</b>       | -0.88                                            | -0.01  | 0.05   | 6.4.1                 | <b>0.78</b>       | -0.84                                            | 0.10  | 0.06   |
| 4.a.1b                | <b>0.39</b>       | 0.54                                             | 0.21   | 0.00   | 7.1.1                 | 0.38              | 0.56                                             | 0.14  | 0.06   |
| 4.a.1b                | <b>0.42</b>       | 0.59                                             | 0.13   | 0.06   | 7.1.2                 | <b>0.45</b>       | 0.55                                             | 0.24  | -0.04  |
| 4.a.1b                | <b>0.40</b>       | 0.60                                             | 0.16   | 0.20   | 12.4.2a               | <b>0.43</b>       | 0.56                                             | 0.20  | -0.20  |
| 6.1.1                 | <b>0.50</b>       | 0.72                                             | 0.07   | 0.27   | 6.3.1                 | <b>0.57</b>       | 0.63                                             | 0.24  | -0.24  |
| 6.1.1                 | 0.24              | 0.08                                             | 0.55   | -0.03  | 6.3.2                 | 0.07              | 0.10                                             | 0.30  | -0.25  |
| 6.1.1                 | 0.35              | -0.22                                            | 0.74   | 0.00   | 6.4.1                 | <b>0.47</b>       | -0.18                                            | 0.79  | -0.02  |
| 6.1.1                 | <b>0.70</b>       | 0.71                                             | 0.23   | 0.06   | 7.1.1                 | <b>0.66</b>       | 0.79                                             | 0.03  | -0.08  |
| 6.1.1                 | <b>0.58</b>       | -0.50                                            | 0.45   | -0.01  | 7.2.1                 | <b>0.40</b>       | -0.70                                            | 0.10  | -0.02  |
| 6.1.1                 | 0.32              | 0.32                                             | 0.31   | -0.15  | 12.4.2a               | 0.36              | 0.30                                             | 0.37  | -0.14  |
| 6.4.1                 | <b>0.50</b>       | -0.28                                            | 0.88   | 0.03   | 9.5.1                 | <b>0.51</b>       | -0.28                                            | 0.87  | 0.16   |
| 6.4.1                 | <b>0.47</b>       | -0.05                                            | 0.73   | -0.03  | 12.4.2a               | 0.24              | -0.06                                            | 0.52  | -0.19  |
| 6.4.1                 | <b>0.45</b>       | -0.01                                            | 0.68   | -0.03  | 15.1.2                | 0.06              | -0.02                                            | 0.23  | -0.17  |
| 6.6.1b                | 0.14              | -0.05                                            | 0.13   | 0.40   | 6.a.1                 | 0.34              | -0.04                                            | -0.25 | 0.55   |
| 7.1.1                 | <b>0.63</b>       | -0.70                                            | 0.20   | 0.06   | 7.2.1                 | <b>0.60</b>       | -0.77                                            | -0.01 | 0.03   |
| 7.1.1                 | 0.11              | -0.19                                            | 0.39   | 0.03   | 12.4.2a               | 0.08              | -0.19                                            | 0.31  | -0.13  |
| 7.1.2                 | <b>0.68</b>       | -0.67                                            | 0.30   | -0.04  | 7.2.1                 | <b>0.61</b>       | -0.83                                            | 0.08  | -0.05  |
| 7.1.2                 | 0.15              | -0.06                                            | 0.41   | -0.15  | 12.4.2a               | 0.05              | -0.07                                            | 0.28  | -0.14  |
| 9.5.1                 | <b>0.49</b>       | 0.45                                             | 0.35   | 0.35   | 12.4.2a               | <b>0.52</b>       | 0.46                                             | 0.32  | -0.45  |
| 12.4.2a               | 0.26              | 0.48                                             | 0.21   | 0.03   | 15.1.2                | 0.29              | 0.46                                             | -0.01 | -0.27  |
| 12.4.2a               | 0.14              | 0.34                                             | 0.14   | -0.05  | 15.5.1                | 0.22              | 0.31                                             | 0.23  | -0.21  |
| 15.5.1                | 0.142             | 0.337                                            | 0.144  | -0.051 | 12.4.2a               | 0.22              | 0.31                                             | 0.23  | -0.21  |

Adjusted R square greater than 0.4 (bold) means acceptable range

Supplementary Table S2. Spearman's correlation coefficients and the number of samples for global and low-income country interlinkages

| No | Indicator 1 | Indicator 2 | Global | No. of countries / sample | S/T global | Low income | No. of countries / sample | S/T low income |
|----|-------------|-------------|--------|---------------------------|------------|------------|---------------------------|----------------|
| 1  | 1.5.1       | 4.a.1a      | 0.54   | 103                       | S          | 0.60       | 17                        | S              |
| 2  | 3.3.3       | 3.9.2       | 0.84   | 135                       | S          | 0.51       | 27                        | S              |
| 3  | 3.3.5       | 6.4.1       | 0.58*  | 155                       | S          | -0.34      | 23                        | N              |
| 4  | 3.3.5       | 7.2.1       | -0.54* | 164                       | T          | 0.21       | 27                        | N              |
| 5  | 3.3.5       | 12.4.2a     | 0.52*  | 61                        | S          |            |                           |                |
| 6  | 3.9.2       | 4.a.1b      | 0.84*  | 79                        | S          | 0.56*      | 11                        | S              |
| 7  | 3.9.2       | 6.1.1       | 0.79*  | 127                       | S          | 0.76*      | 34                        | S              |
| 8  | 3.9.2       | 7.1.1       | 0.91*  | 186                       | S          | 0.66*      | 27                        | S              |
| 9  | 3.9.2       | 7.1.2       | -0.85  | 145                       | T          | -0.56      | 27                        | T              |
| 10 | 3.9.2       | 7.2.1       | -0.61  | 181                       | T          | 0.51       | 27                        | T              |
| 11 | 4.a.1a      | 6.4.1       | 0.60   | 74                        | S          |            |                           |                |
| 12 | 4.a.1a      | 7.1.1       | 0.84   | 125                       | S          | 0.10       | 14                        | N              |
| 13 | 4.a.1a      | 7.1.2       | 0.61   | 50                        | S          |            |                           |                |
| 14 | 4.a.1b      | 6.1.1       | 0.79   | 61                        | S          |            |                           |                |
| 15 | 4.a.1b      | 6.4.1       | 0.55   | 78                        | S          | -0.37      | 12                        | N              |
| 16 | 4.a.1b      | 7.1.1       | 0.81   | 128                       | S          | 0.33       | 15                        | N              |
| 17 | 4.a.1b      | 7.1.2       | 0.50   | 56                        | S          |            |                           |                |
| 18 | 4.a.1b      | 12.4.2a     | 0.50   | 71                        | S          |            |                           |                |
| 19 | 6.1.1       | 6.3.1       | 0.67   | 26                        | S          |            |                           |                |
| 20 | 6.1.1       | 6.3.2       | 0.50   | 25                        | S          |            |                           |                |
| 21 | 6.1.1       | 6.4.1       | 0.68   | 113                       | S          |            |                           |                |
| 22 | 6.1.1       | 7.1.1       | 0.62   | 67                        | S          |            |                           |                |
| 23 | 6.1.1       | 7.2.1       | -0.51  | 160                       | T          |            |                           |                |
| 24 | 6.1.1       | 12.4.2a     | 0.55   | 58                        | S          |            |                           |                |
| 25 | 6.4.1       | 9.5.1       | 0.55   | 120                       | S          | 0.55       | 12                        | S              |
| 26 | 6.4.1       | 12.4.2a     | 0.64   | 65                        | S          |            |                           |                |
| 27 | 6.4.1       | 15.1.2      | 0.50   | 158                       | S          | 0.57       | 22                        | S              |
| 28 | 6.6.1b      | 6.a.1       | 0.66   | 167                       | S          | 0.51       | 26                        | S              |
| 29 | 7.1.1       | 7.2.1       | -0.67  | 148                       | T          | -0.51      | 27                        | T              |
| 30 | 7.1.1       | 12.4.2a     | 0.57   | 77                        | S          |            |                           |                |
| 31 | 7.1.2       | 7.2.1       | -0.72  | 190                       | T          | -0.65      | 27                        | T              |
| 32 | 7.1.2       | 12.4.2a     | 0.55   | 76                        | S          |            |                           |                |
| 33 | 9.5.1       | 12.4.2a     | 0.52   | 71                        | S          |            |                           |                |
| 34 | 12.4.2a     | 15.1.2      | 0.57   | 71                        | S          |            |                           |                |
| 35 | 12.4.2a     | 15.5.1      | 0.60   | 77                        | S          |            |                           |                |
| 36 | 15.5.1      | 12.4.2a     | 0.60   | 77                        | S          |            |                           |                |

S: synergy; T: trade-off \*applied analogous rationale
